# Supplementary material for: Classification of lung cancer using ensemble-based feature selection and machine learning methods
Source: Royal Society of Chemistry journal article supplement (doi:10.1039/c4mb00659c), 2014-12-05
Supplement: c4mb00659c1.xlsx [file c4mb00659c1.xlsx]

## Sheet: Sheet1
Table S1 A. IFS performance curve on 45 overlapped feature sets
probe ID	gene	accuracy	precision	recall	F-score
cg15905979	ST18	0.542568	0.340528	0.550256	0.420703
cg10493739	TMEM38B	0.510185	0.396819	0.551035	0.461382
cg14288464	WFDC5	0.618189	0.406967	0.657522	0.502757
cg19570545	PKP1	0.664066	0.506783	0.670452	0.57724
cg03700462	HOXA1	0.551176	0.42961	0.576783	0.492435
cg07752420	CDKN2A	0.626455	0.469656	0.529656	0.497855
cg02917972	ZCCHC11	0.77662	0.57414	0.778291	0.660807
cg13474750	SH3BP1	0.67662	0.50336	0.725693	0.594417
cg23089298	SEMA4C	0.793981	0.590643	0.784056	0.673744
cg25955816	HIST3H3	0.639325	0.455387	0.615387	0.523433
cg20851245	RNF25	0.679352	0.572225	0.722225	0.638534
cg02863237	RBM17	0.778935	0.568257	0.805228	0.6663
cg25203980	CENTB5	0.793981	0.596688	0.785596	0.678233
cg10289912	ZNRF2	0.782407	0.583801	0.819296	0.681786
cg18565510	CENTB5	0.796296	0.594755	0.843481	0.697611
cg20854748	PIP5K1A	0.865425	0.667853	0.843658	0.745531
cg04710641	RDBP	0.80787	0.628492	0.820027	0.711596
cg02301754	TMOD4	0.777778	0.579014	0.812841	0.676286
cg09875273	ERBB2	0.784722	0.592708	0.808971	0.684156
cg00777121	RASSF1	0.798611	0.594446	0.811834	0.686337
cg23112213	CDC23	0.78588	0.587136	0.824528	0.685872
cg10353436	EIF4A1	0.783565	0.583926	0.817283	0.681173
cg13921352	FAM19A4	0.790509	0.589852	0.843264	0.694153
cg10221736	TICAM1	0.788194	0.592026	0.795053	0.678681
cg23076086	FYN	0.795139	0.604763	0.804904	0.690626
cg09990086	TACC1	0.783565	0.574873	0.845436	0.684384
cg13412063	SOS1	0.788194	0.581906	0.814538	0.678845
cg20394284	JAK2	0.782407	0.581797	0.766327	0.661433
cg08779777	PIK3CG	0.78125	0.574449	0.822791	0.67655
cg26651830	BCAP29	0.802083	0.611277	0.768025	0.680744
cg14127336	TCL1A	0.814815	0.619104	0.820303	0.705642
cg03860890	EGFR	0.815972	0.612906	0.82972	0.70502
cg01086868	AR	0.787037	0.586406	0.824587	0.685393
cg19162158	NRG1	0.831019	0.64072	0.835544	0.725277
cg03001305	STAT5A	0.795139	0.591898	0.818447	0.686977
cg05498681	SRC	0.824074	0.635532	0.849404	0.727066
cg11840168	RBBP8	0.767361	0.560808	0.826601	0.668245
cg15931943	FHIT	0.800926	0.594661	0.846442	0.698556
cg15105987	SOX2	0.792824	0.594304	0.77987	0.674558
cg13882267	ITGA9	0.813657	0.625854	0.811459	0.706672
cg17342759	PPP2R2B	0.827546	0.631569	0.836492	0.719729
cg03776464	EPHA4	0.825231	0.624716	0.831576	0.713454
cg01770232	IL6	0.803241	0.611914	0.850193	0.711637
cg02388150	SFRP1	0.783565	0.590806	0.790926	0.676374
cg12567315	TSPAN13	0.804398	0.617168	0.807806	0.699735
