# Supplementary material for: Classification of lung cancer using ensemble-based feature selection and machine learning methods
Source: Royal Society of Chemistry journal article supplement (doi:10.1039/c4mb00659c), 2014-12-05
Supplement: c4mb00659c2.xlsx [file c4mb00659c2.xlsx]

## Sheet: Sheet1
Table S1 B. IFS performance curve on top 200 HUM feature sets
probe ID	gene	accuracy	precision	recall	F-score
cg02863237	RBM17	0.557151	0.376627	0.606733	0.464757
cg14009312	STK11	0.544568	0.302411	0.575095	0.396385
cg11628026	ACTL7A	0.491056	0.286776	0.409732	0.337402
cg12090388	RPL11	0.531392	0.396853	0.521288	0.450638
cg02774486	H2-ALPHA	0.573308	0.41912	0.5098	0.460034
cg09726469	MCL1	0.485534	0.333613	0.524984	0.407971
cg10221736	TICAM1	0.513485	0.390702	0.600948	0.473537
cg10289912	ZNRF2	0.578783	0.407691	0.556045	0.47045
cg02301754	TMOD4	0.541814	0.381826	0.577318	0.45965
cg13183539	FZR1	0.603086	0.452179	0.643816	0.531244
cg12441964	FLJ35894	0.66594	0.517606	0.620803	0.564527
cg15637528	C6orf146	0.564108	0.405015	0.576685	0.47584
cg03144206	ACTN4	0.619849	0.535901	0.588278	0.560869
cg22308759	ZNF161	0.671654	0.56395	0.534417	0.548787
cg04176254	AGRP	0.63864	0.472634	0.574464	0.518598
cg23886755	PHC2	0.658395	0.488422	0.660744	0.561663
cg20851245	RNF25	0.699708	0.56948	0.655793	0.609597
cg23934633	RNF113B	0.607524	0.407062	0.59653	0.483911
cg22248011	TRAM2	0.643788	0.507529	0.576903	0.539997
cg16129797	MRPL15	0.753472	0.573338	0.672609	0.619019
cg00665395	TTLL4	0.708333	0.516266	0.660704	0.579622
cg00491839	PPP1R15A	0.760417	0.555029	0.767018	0.644028
cg10005894	ST6GAL1	0.730324	0.535657	0.733989	0.619332
cg12813922	RAB3GAP1	0.74537	0.532484	0.706803	0.607384
cg13474750	SH3BP1	0.787037	0.606254	0.754955	0.672482
cg09990086	TACC1	0.771991	0.577205	0.738174	0.64784
cg20334738	MAB21L2	0.755787	0.566769	0.684573	0.620126
cg27239147	TUSC4	0.755787	0.574224	0.683724	0.624208
cg07883333	F11R	0.72338	0.530466	0.682777	0.597061
cg06417705	ETAA16	0.744213	0.559804	0.72775	0.632824
cg16788436	GRLF1	0.733796	0.533012	0.75077	0.623422
cg07810967	IL13	0.740741	0.549255	0.741827	0.631179
cg26354413	SUV39H2	0.77662	0.581039	0.762201	0.659404
cg20854748	PIP5K1A	0.733796	0.529122	0.725381	0.6119
cg04536998	FLJ11305	0.798611	0.594105	0.775113	0.672644
cg26698580	ACD	0.738426	0.534921	0.74998	0.624453
cg07868688	ORC3L	0.747685	0.542682	0.703467	0.612702
cg09663323	LOC112714	0.704861	0.518774	0.660231	0.581016
cg17095936	TBX19	0.733796	0.532631	0.756969	0.625287
cg21430666	HIST3H3	0.769676	0.574483	0.700407	0.631226
cg12979743	NDUFB5	0.703704	0.502916	0.673458	0.575825
cg09134747	ATP2C1	0.733796	0.524927	0.749348	0.617375
cg13847113	MGC24975	0.767361	0.556135	0.739773	0.634943
cg26490839	RPS11	0.715278	0.511026	0.73008	0.601222
cg23112213	CDC23	0.740741	0.56387	0.673774	0.613942
cg11044263	TMEM65	0.747685	0.548375	0.779337	0.643768
cg23260799	PTDSS2	0.758102	0.571909	0.737009	0.644046
cg12337114	TAS2R3	0.748843	0.558442	0.747177	0.639168
cg21434440	CD2AP	0.753472	0.554341	0.729448	0.629952
cg23076086	FYN	0.778935	0.584066	0.796592	0.673972
cg12032009	VPS13C	0.773148	0.567165	0.78755	0.659431
cg25162794	ANKRD23	0.787037	0.596223	0.773099	0.673237
cg04413148	CTRL	0.734954	0.541589	0.734305	0.623393
cg12609467	DAG1	0.761574	0.568765	0.773632	0.655566
cg16863382	CTRB1	0.731481	0.554962	0.675255	0.609227
cg15815016	CARD4	0.722222	0.519732	0.710653	0.60038
cg18797282	CYB561D2	0.733796	0.528702	0.708541	0.605551
cg13921352	FAM19A4	0.737269	0.534593	0.739754	0.620658
cg08779777	PIK3CG	0.690972	0.50089	0.664989	0.571391
cg12371177	PLEKHG6	0.719907	0.518641	0.712509	0.600311
cg25261329	RAD51AP1	0.763889	0.58064	0.706586	0.637452
cg21565972	FLJ23754	0.765046	0.562439	0.810511	0.664064
cg21010050	TBC1D23	0.695602	0.505664	0.696261	0.58585
cg16470957	TUSC4	0.765046	0.571156	0.721768	0.637689
cg21571665	ZNF410	0.782407	0.57615	0.752942	0.652788
cg23112213	CDC23	0.783565	0.602363	0.750612	0.668365
cg01489608	LCAT	0.736111	0.546266	0.696853	0.612439
cg08083689	ACOX3	0.763889	0.570353	0.697485	0.627545
cg16854524	DKFZp686L1814	0.707176	0.521847	0.691444	0.594792
cg01404197	ZW10	0.737269	0.530455	0.705046	0.605415
cg04914305	MRPL34	0.760417	0.579484	0.72473	0.644019
cg25309588	ATP8A1	0.755787	0.576968	0.721867	0.641335
cg03860890	EGFR	0.740741	0.532797	0.769664	0.629692
cg04691540	ABL2	0.697917	0.503472	0.685047	0.58039
cg13325666	MLLT4	0.800926	0.595939	0.828872	0.693365
cg23968678	LENG4	0.778935	0.583595	0.747019	0.655271
cg19216044	DCST1	0.730324	0.535723	0.760878	0.628751
cg02567144	EFHC1	0.700231	0.508418	0.709488	0.592355
cg11654333	DCK	0.704861	0.497274	0.66949	0.570672
cg11840168	RBBP8	0.722222	0.538849	0.675255	0.599389
cg09768944	PDCL	0.719907	0.528378	0.700762	0.602482
cg19009921	RPL23A	0.743056	0.544618	0.767492	0.637127
cg04274487	RAB31	0.770833	0.570164	0.72696	0.639085
cg15994159	RAI1	0.702546	0.507609	0.651445	0.570602
cg16823737	CKAP5	0.797454	0.609437	0.776534	0.682913
cg16948979	WDR21A	0.722222	0.521417	0.717425	0.603915
cg06827976	FGR	0.765046	0.558384	0.722893	0.630078
cg02631957	CSNK1G3	0.736111	0.538141	0.748381	0.626083
cg15749322	ANKRD42	0.806713	0.600182	0.758766	0.670221
cg21487067	KIAA0152	0.725694	0.550047	0.706527	0.618544
cg00777121	RASSF1	0.78125	0.596414	0.725105	0.654494
cg03410718	FLJ45684	0.746528	0.537588	0.769979	0.633133
cg13945069	DDX59	0.741898	0.553951	0.700979	0.618852
cg06489804	FBXW9	0.702546	0.508464	0.682026	0.582593
cg18565510	CENTB5	0.766204	0.563391	0.764629	0.648763
cg04710641	RDBP	0.744213	0.54932	0.6733	0.605024
cg09458170	ATXN3	0.729167	0.532538	0.727691	0.615005
cg21589280	DDAH1	0.729167	0.518276	0.722893	0.603718
cg04582843	VAV2	0.770833	0.562808	0.754106	0.644563
cg25974870	NUDT21	0.734954	0.530172	0.712568	0.607985
cg20645649	RPL35	0.739583	0.540967	0.757009	0.631009
cg08015253	MOCOS	0.75463	0.550016	0.771993	0.642369
cg23325242	CYB5R3	0.753472	0.55751	0.716003	0.626894
cg17036441	NCBP2	0.731481	0.532668	0.693615	0.602579
cg15905979	ST18	0.711806	0.514638	0.709923	0.596709
cg19803671	UBE2E2	0.711806	0.509978	0.697801	0.589285
cg00905170	RRS1	0.778935	0.577131	0.728283	0.643956
cg17860186	PLEKHG2	0.771991	0.584691	0.735529	0.651493
cg10493739	TMEM38B	0.771991	0.559201	0.749506	0.640517
cg18730023	PTK9	0.816435	0.63279	0.816636	0.713053
cg21452766	CTH	0.725694	0.5214	0.71245	0.602134
cg19515446	HIST1H1T	0.709491	0.512241	0.665739	0.578989
cg01086868	AR	0.733796	0.528368	0.667476	0.589831
cg13525683	TIAF1	0.769676	0.558612	0.728915	0.6325
cg16282679	EGFL8	0.765046	0.565366	0.79829	0.661936
cg13277160	LOC151194	0.747685	0.540166	0.691562	0.60656
cg27643859	TM9SF4	0.753472	0.535304	0.753889	0.626066
cg02750754	MGC4093	0.767361	0.57919	0.721669	0.642627
cg19490266	JTB	0.730324	0.521942	0.738865	0.611743
cg16388829	ARID5A	0.753472	0.56778	0.688917	0.62251
cg23213688	EXOC8	0.74537	0.54902	0.701038	0.615786
cg19426277	GPR146	0.753472	0.552286	0.754106	0.637607
cg02161046	HIAT1	0.78125	0.563175	0.779081	0.653763
cg02506426	AQP11	0.71875	0.514814	0.72469	0.601984
cg06433995	NOL7	0.752315	0.542935	0.744057	0.627781
cg25750404	VAMP1	0.739583	0.552926	0.705204	0.619849
cg25203980	CENTB5	0.722222	0.520381	0.727967	0.606915
cg24330485	EEF1B2	0.765046	0.565666	0.745045	0.643081
cg10971750	VRK1	0.728009	0.525781	0.734838	0.612975
cg11011602	RPL7A	0.751157	0.557484	0.737009	0.634798
cg08448040	HDAC11	0.792824	0.578044	0.795803	0.669666
cg26651830	BCAP29	0.762731	0.559992	0.732192	0.634618
cg02917972	ZCCHC11	0.755787	0.55909	0.763208	0.645395
cg20492869	TAF1A	0.77662	0.56791	0.732469	0.639777
cg14288464	WFDC5	0.761574	0.553691	0.717602	0.62508
cg23060239	RUSC1	0.72338	0.512191	0.729823	0.60194
cg03001305	STAT5A	0.756944	0.551966	0.73316	0.629789
cg25955816	HIST3H3	0.726852	0.518479	0.683665	0.589723
cg20902737	EFTUD2	0.758102	0.572845	0.727691	0.641049
cg13438673	ZNF526	0.800926	0.598758	0.764155	0.671421
cg12346515	AMACR	0.741898	0.553854	0.731126	0.630262
cg02215538	MASK-BP3	0.783565	0.582727	0.773316	0.664628
cg26402828	PCK2	0.760417	0.575266	0.699281	0.63124
cg27554769	KLHL12	0.736111	0.547649	0.709804	0.618271
cg05498681	SRC	0.740741	0.55518	0.695155	0.617333
cg10313093	TPARL	0.734954	0.5332	0.746328	0.622014
cg21914262	MTIF3	0.766204	0.569607	0.754106	0.648999
cg15952725	ELA2A	0.762731	0.574879	0.766702	0.657077
cg12567315	TSPAN13	0.767361	0.55742	0.751086	0.639921
cg13031679	FLJ10560	0.766204	0.565804	0.759082	0.648345
cg08871189	COMMD9	0.777778	0.578759	0.754482	0.65504
cg09834162	DNAJB9	0.753472	0.549152	0.768913	0.640712
cg25739003	EEF1G	0.74537	0.559602	0.695846	0.620331
cg24615044	MGC3123	0.777778	0.579378	0.771401	0.661741
cg13412063	SOS1	0.719907	0.506936	0.693457	0.585706
cg18110535	LPIN2	0.769676	0.575151	0.772724	0.659457
cg24269276	SFRS1	0.763889	0.581991	0.679756	0.627086
cg00834958	TSC22D4	0.753472	0.554809	0.720406	0.626855
cg18606310	PYGB	0.795139	0.600624	0.768815	0.674391
cg14358709	RNF19	0.740741	0.539401	0.714305	0.614653
cg26770281	FLJ14768	0.769676	0.563834	0.79681	0.660376
cg14127336	TCL1A	0.753472	0.556669	0.766544	0.644963
cg11235871	QARS	0.783565	0.598293	0.746269	0.664138
cg18956095	ZHX1	0.731481	0.527979	0.751461	0.620202
cg12562500	CLPP	0.726852	0.5365	0.736003	0.620612
cg12661964	IFI35	0.751157	0.554849	0.738332	0.633574
cg23089298	SEMA4C	0.732639	0.541685	0.653242	0.592256
cg08095532	PSMA4	0.760417	0.570996	0.689232	0.624568
cg13014406	RER1	0.793981	0.59168	0.75918	0.665045
cg00559473	AAAS	0.731481	0.539725	0.670122	0.597896
cg19162158	NRG1	0.732639	0.53076	0.713792	0.608817
cg18878891	GLE1L	0.778935	0.566191	0.777758	0.655322
cg10507231	PIK3C2B	0.729167	0.533667	0.660231	0.59024
cg01134491	MTHFR	0.751157	0.538078	0.806227	0.645409
cg20394284	JAK2	0.722222	0.528638	0.717425	0.60873
cg19324027	MRPL53	0.784722	0.589802	0.783207	0.672883
cg19793718	DHX37	0.716435	0.526093	0.663725	0.586949
cg07059403	TCTE3	0.782407	0.57034	0.77067	0.655542
cg07617560	DNAJA3	0.686343	0.485666	0.670023	0.56314
cg14534967	ABHD11	0.710648	0.532637	0.716576	0.611064
cg04970994	ZNF142	0.790509	0.582215	0.828556	0.683878
cg05417985	ENPP1	0.706019	0.517495	0.676577	0.586439
cg04200765	SDFR1	0.725694	0.535399	0.672451	0.59615
cg27501380	RBBP6	0.737269	0.531472	0.711403	0.608413
cg11096640	ACTR3B	0.769676	0.563744	0.757858	0.646545
cg15881088	ARMET	0.748843	0.544389	0.73776	0.626493
cg01788438	HNRPR	0.753472	0.557425	0.754106	0.641018
cg21743569	NR1H2	0.725694	0.532162	0.714305	0.609926
cg14037413	ZNF143	0.778935	0.567106	0.753317	0.647081
cg15286372	LRRC1	0.741898	0.546894	0.728165	0.624644
cg03386903	KCNAB3	0.770833	0.592312	0.751402	0.662439
cg20520365	C20orf144	0.747685	0.549647	0.758075	0.637251
cg23445511	NIP7	0.778935	0.572803	0.816809	0.673383
cg04398275	SBNO1	0.77662	0.571024	0.806799	0.668738
cg10353436	EIF4A1	0.736111	0.560018	0.68171	0.614901
cg01852131	PPP1R10	0.748843	0.533149	0.743524	0.621003
cg06358566	RPIA	0.758102	0.548707	0.778232	0.643618
cg05065690	DDX23	0.766204	0.590033	0.76992	0.668079
cg06429195	DAZL	0.739583	0.539788	0.761411	0.631726
cg09875273	ERBB2	0.777778	0.58474	0.761451	0.661497
