# Supplementary material for: Classification of lung cancer using ensemble-based feature selection and machine learning methods
Source: Royal Society of Chemistry journal article supplement (doi:10.1039/c4mb00659c), 2014-12-05
Supplement: c4mb00659c3.xlsx [file c4mb00659c3.xlsx]

## Sheet: Sheet1
Table S1 C. IFS performance curve on top 200 mRMR feature sets
probe ID	gene	accuracy	precision	recall	F-score
cg15905979	ST18	0.553048	0.404529	0.608924	0.486115
cg26809911	COG7	0.527684	0.381379	0.58637	0.462164
cg10493739	TMEM38B	0.695048	0.505296	0.701461	0.587435
cg26928972	CSTA	0.581745	0.419086	0.611818	0.497436
cg12754733	FLJ35119	0.469321	0.338287	0.550463	0.419048
cg14288464	WFDC5	0.703861	0.573273	0.671519	0.618519
cg06530118	CLN3	0.590521	0.426009	0.642715	0.512391
cg19570545	PKP1	0.541462	0.419499	0.594092	0.491758
cg03693099	CEL	0.691847	0.532086	0.700544	0.604804
cg23877786	RPL13	0.63591	0.496502	0.651778	0.563641
cg10528989	BDKRB1	0.598229	0.45707	0.563425	0.504705
cg03700462	HOXA1	0.669535	0.503774	0.700407	0.586036
cg21932814	CSTA	0.706204	0.585416	0.733614	0.65119
cg07752420	CDKN2A	0.731481	0.536878	0.742676	0.623227
cg26778908	PRPF18	0.738426	0.549821	0.73695	0.629779
cg06547766	LPP	0.730324	0.536138	0.691444	0.603967
cg13393195	IQCD	0.761574	0.556126	0.749763	0.638588
cg03846767	TP73	0.744213	0.548231	0.762931	0.638003
cg14930396	SF3B14	0.74537	0.534519	0.778765	0.63393
cg11693019	AKR1B10	0.75	0.540496	0.746387	0.626971
cg21898046	MGAT1	0.738426	0.532699	0.757601	0.625549
cg02917972	ZCCHC11	0.737269	0.537544	0.741985	0.623432
cg13314167	C9orf84	0.778935	0.578171	0.743051	0.650323
cg01746088	SFRS7	0.784722	0.579618	0.777758	0.664227
cg05840031	PAX6	0.744213	0.542088	0.74236	0.626611
cg26916927	GLO1	0.796296	0.60212	0.763425	0.673246
cg24043307	ATF1	0.791667	0.601315	0.786859	0.681687
cg13474750	SH3BP1	0.75	0.548825	0.774264	0.642338
cg12567315	TSPAN13	0.722222	0.51692	0.758608	0.614867
cg02034222	DQX1	0.767361	0.559346	0.799455	0.658186
cg05940463	C1orf86	0.752315	0.554572	0.705204	0.620883
cg11398517	FAM112A	0.775463	0.585273	0.730178	0.649744
cg23089298	SEMA4C	0.744213	0.547506	0.711443	0.618801
cg22091798	LOC51035	0.726852	0.525074	0.685639	0.594709
cg21596858	DCST2	0.732639	0.53067	0.758647	0.624503
cg25955816	HIST3H3	0.752315	0.56594	0.726802	0.636363
cg24615044	MGC3123	0.75463	0.546478	0.699499	0.613592
cg11050527	ATP6V1H	0.795139	0.588519	0.767235	0.666098
cg07749074	HRG	0.762731	0.573444	0.788123	0.663859
cg09009042	PPP1R8	0.736111	0.543468	0.711127	0.616095
cg20851245	RNF25	0.736111	0.532643	0.671504	0.594067
cg20713492	AQP10	0.761574	0.570612	0.715944	0.63507
cg06901392	HSPH1	0.762731	0.55603	0.800719	0.65631
cg18515587	SELENBP1	0.717593	0.5409	0.647477	0.589409
cg02863237	RBM17	0.759259	0.564265	0.672728	0.613741
cg08718071	HDDC3	0.746528	0.542359	0.7485	0.62897
cg27501380	RBBP6	0.777778	0.569181	0.788873	0.661257
cg23540745	HIST1H4G	0.773148	0.569623	0.760404	0.651331
cg07292816	EFCAB3	0.797454	0.596575	0.770295	0.672396
cg25203980	CENTB5	0.75463	0.547685	0.739181	0.629185
cg13625403	TRIM29	0.796296	0.612931	0.77067	0.682809
cg10289912	ZNRF2	0.798611	0.598677	0.782042	0.678184
cg24980458	FOXP1	0.743056	0.550568	0.640705	0.592227
cg01139059	TSN	0.733796	0.530711	0.681079	0.596566
cg24459563	CACNG1	0.788194	0.591448	0.74384	0.658948
cg12346515	AMACR	0.725694	0.520451	0.710179	0.60069
cg18565510	CENTB5	0.74537	0.548752	0.76611	0.639465
cg20491707	PPYR1	0.741898	0.542951	0.662185	0.596669
cg24330485	EEF1B2	0.748843	0.555013	0.72319	0.628037
cg16478145	TFPI	0.769676	0.565454	0.759615	0.648309
cg21571665	ZNF410	0.738426	0.548997	0.737483	0.629432
cg20854748	PIP5K1A	0.729167	0.530728	0.712094	0.608178
cg06363129	SOSTDC1	0.75463	0.559064	0.764748	0.645927
cg21463023	SS18L2	0.783565	0.585068	0.744472	0.655214
cg12431699	CDK5RAP1	0.72338	0.539981	0.680388	0.602108
cg07471052	CDK3	0.767361	0.572253	0.74157	0.646001
cg04710641	RDBP	0.72338	0.52132	0.729349	0.608033
cg15127806	MRPL42	0.787037	0.581479	0.760937	0.659213
cg02831294	CALML3	0.765046	0.558498	0.734324	0.634455
cg15341340	DNASE2	0.741898	0.538338	0.748282	0.626181
cg13847113	MGC24975	0.828796	0.646971	0.84533	0.732968
cg17860186	PLEKHG2	0.787037	0.600506	0.706112	0.649041
cg25182523	C1orf24	0.766204	0.571636	0.731087	0.641603
cg06868758	NDUFS1	0.793981	0.58109	0.780779	0.666295
cg09768944	PDCL	0.715278	0.528969	0.70092	0.602924
cg02301754	TMOD4	0.75	0.547031	0.762833	0.637155
cg11256445	HCLS1	0.789352	0.572715	0.815012	0.672711
cg14789804	OS9	0.784722	0.599194	0.737858	0.661336
cg09875273	ERBB2	0.740741	0.5511	0.706112	0.619049
cg27549944	PLEKHA6	0.802083	0.59683	0.786919	0.678818
cg11296937	HSPC152	0.770833	0.567092	0.74538	0.644126
cg09556292	RCOR1	0.755787	0.559579	0.773731	0.649457
cg13553455	COL17A1	0.74537	0.549493	0.721827	0.62398
cg04914305	MRPL34	0.77662	0.583443	0.775369	0.665852
cg00777121	RASSF1	0.758102	0.552646	0.806168	0.655756
cg22909962	RPL7L1	0.700231	0.510796	0.679756	0.583287
cg15089387	TSLP	0.767361	0.561004	0.747394	0.640923
cg23112213	CDC23	0.756944	0.548562	0.77533	0.642524
cg06114765	USP25	0.741898	0.546081	0.750296	0.632104
cg01324261	SCRG1	0.760417	0.564028	0.703151	0.625952
cg16823737	CKAP5	0.77662	0.573392	0.744847	0.647969
cg06643227	C9orf84	0.761574	0.562503	0.81596	0.66593
cg20442697	LRRC17	0.78588	0.567204	0.763425	0.650847
cg10353436	EIF4A1	0.728009	0.540135	0.721709	0.617858
cg08083689	ACOX3	0.751157	0.548217	0.722716	0.623487
cg21207418	ACP5	0.763889	0.563289	0.750454	0.643539
cg10313093	TPARL	0.75	0.555004	0.762043	0.64225
cg05044994	FLJ42393	0.75	0.55463	0.755943	0.639825
cg22949637	PRPF38B	0.736111	0.53764	0.725677	0.617664
cg12437239	GOLPH4	0.775463	0.583505	0.736476	0.651127
cg18992201	DPPA2	0.783565	0.588354	0.74998	0.659408
cg13921352	FAM19A4	0.741898	0.558334	0.702717	0.62226
cg16860587	ELAVL1	0.783565	0.571786	0.807707	0.669573
cg13135121	HSPA2	0.746528	0.541267	0.734364	0.6232
cg08843492	IFITM2	0.736111	0.531719	0.67865	0.596266
cg11857445	AATF	0.744213	0.548315	0.677801	0.606221
cg22264436	SOST	0.75463	0.567942	0.676893	0.61765
cg12513308	CKLF	0.769676	0.567646	0.794954	0.66234
cg12730381	YWHAG	0.763889	0.562755	0.792841	0.658272
cg10221736	TICAM1	0.778935	0.582337	0.773849	0.664571
cg18730023	PTK9	0.765046	0.544246	0.795645	0.646361
cg05573563	OFD1	0.755787	0.551881	0.68864	0.612722
cg03905094	DEPDC1B	0.74537	0.539309	0.70627	0.6116
cg12385643	UGT1A6	0.751157	0.54439	0.738391	0.626721
cg23076086	FYN	0.702546	0.518153	0.69859	0.594992
cg24342628	TPMT	0.710648	0.531891	0.662244	0.589953
cg09990086	TACC1	0.771991	0.572025	0.807707	0.669737
cg11977634	DDR1	0.763889	0.565087	0.731837	0.637742
cg05830416	C9orf100	0.756944	0.560655	0.779614	0.652249
cg13412063	SOS1	0.768519	0.561811	0.807392	0.662577
cg11795262	GATAD2A	0.759259	0.547196	0.744097	0.630634
cg20394284	JAK2	0.725694	0.519713	0.701927	0.597231
cg17164340	VPS36	0.78125	0.578695	0.768025	0.660051
cg08779777	PIK3CG	0.703704	0.505708	0.674406	0.577999
cg04254916	KRT5	0.737269	0.542406	0.712608	0.615965
cg09458170	ATXN3	0.743056	0.56692	0.664989	0.612051
cg12333095	ANKRD13	0.736111	0.538955	0.682026	0.602108
cg26208930	TP73	0.77662	0.568202	0.720939	0.635522
cg26651830	BCAP29	0.766204	0.579138	0.771204	0.661511
cg23710218	MSC	0.755787	0.553637	0.789821	0.650968
cg14689355	ACVR2A	0.758102	0.542198	0.747019	0.628338
cg14127336	TCL1A	0.728009	0.534921	0.735588	0.619408
cg03392046	CCDC75	0.702546	0.50056	0.66489	0.57114
cg04998282	NOL11	0.763889	0.562655	0.732409	0.636406
cg03860890	EGFR	0.81713	0.613699	0.826759	0.704472
cg08504583	FLJ30046	0.77662	0.581352	0.777383	0.665226
cg26623286	MED31	0.756944	0.55984	0.747907	0.64035
cg16509045	TRPM6	0.811343	0.61528	0.783108	0.689123
cg25412384	LRP10	0.748843	0.552353	0.733614	0.630209
cg01086868	AR	0.753472	0.553716	0.696952	0.617132
cg13271076	PRMT2	0.792824	0.599659	0.737542	0.661492
cg19162158	NRG1	0.734954	0.54843	0.699913	0.614981
cg24340657	KRT24	0.728009	0.537612	0.677742	0.599598
cg11037424	C20orf14	0.747685	0.558995	0.736536	0.6356
cg03001305	STAT5A	0.768519	0.56406	0.764688	0.649228
cg11323731	AKR1A1	0.756944	0.566632	0.772309	0.653673
cg19988449	BNC1	0.704861	0.509468	0.641179	0.567785
cg08426384	ADCK1	0.814815	0.619632	0.789031	0.694146
cg05498681	SRC	0.75463	0.567181	0.726329	0.636965
cg08585897	TERF2IP	0.78125	0.585876	0.79215	0.673575
cg16129797	MRPL15	0.756944	0.564352	0.729764	0.636487
cg25841091	UFD1L	0.771991	0.586442	0.71166	0.643011
cg15778232	PHB2	0.761574	0.569517	0.758706	0.650638
cg26628634	NME7	0.78125	0.590412	0.742991	0.657972
cg20203792	MGC29898	0.748843	0.535897	0.753633	0.626383
cg11840168	RBBP8	0.75463	0.577267	0.679914	0.6244
cg27560864	SCN4B	0.755787	0.563218	0.723407	0.63334
cg15931943	FHIT	0.71875	0.521928	0.748026	0.61485
cg15105987	SOX2	0.748843	0.554534	0.732094	0.631062
cg23494853	C2orf25	0.746528	0.561599	0.713832	0.62863
cg03534410	TMEM40	0.755787	0.562477	0.745222	0.641081
cg13882267	ITGA9	0.791667	0.600173	0.774362	0.67623
cg19009921	RPL23A	0.766204	0.564385	0.747809	0.643277
cg17342759	PPP2R2B	0.759259	0.548844	0.803581	0.652222
cg24352688	OFD1	0.75463	0.541335	0.73849	0.624727
cg19490266	JTB	0.748843	0.576202	0.73468	0.645861
cg21581873	PLEKHA6	0.721065	0.51183	0.665581	0.578667
cg14271908	TFAM	0.767361	0.576684	0.744314	0.649863
cg03776464	EPHA4	0.797454	0.609277	0.785477	0.686247
cg06310844	PDCD5	0.770833	0.58812	0.738806	0.654907
cg20702327	CSNK2A1	0.767361	0.579846	0.714463	0.640154
cg20988616	ENPP3	0.783565	0.578921	0.791992	0.668898
cg14534967	ABHD11	0.793981	0.603408	0.759812	0.672638
cg01770232	IL6	0.788194	0.585971	0.748717	0.657421
cg01489608	LCAT	0.715278	0.527988	0.676419	0.593058
cg09013626	RYBP	0.792824	0.588118	0.761569	0.663699
cg21762589	BNIP3	0.72338	0.524992	0.752665	0.618544
cg13289561	DKFZP586D0919	0.737269	0.54912	0.727375	0.625802
cg03952109	C5orf21	0.78588	0.580807	0.795329	0.671347
cg23886755	PHC2	0.729167	0.53166	0.730652	0.615472
cg02913364	UBE2J2	0.752315	0.576193	0.717326	0.63906
cg23610841	PURG	0.716435	0.513068	0.701038	0.592502
cg14966252	ZNF622	0.804398	0.607326	0.768499	0.678472
cg11695358	MAPK15	0.767361	0.588261	0.729645	0.651369
cg01404197	ZW10	0.760417	0.555715	0.758391	0.641424
cg02388150	SFRP1	0.748843	0.551449	0.733732	0.629664
cg20857253	TCP10L	0.771991	0.565258	0.728599	0.636618
cg01226883	MTHFR	0.758102	0.555028	0.794006	0.65335
cg11820497	ATG4D	0.768519	0.544859	0.771677	0.63873
cg02774486	H2-ALPHA	0.769676	0.574863	0.772092	0.659038
cg12567315	TSPAN13	0.768519	0.575222	0.729705	0.643319
cg09645888	ME3	0.760417	0.553748	0.738233	0.632819
cg00230368	IGF2R	0.751157	0.549852	0.72242	0.624432
cg06598631	ORC3L	0.78125	0.585979	0.702026	0.638774
cg16608652	B3GALT2	0.766204	0.580053	0.722143	0.643346
cg05394497	FLJ13984	0.762731	0.581968	0.737582	0.650599
cg17051321	BNC1	0.739583	0.547088	0.711403	0.618519
cg09726469	MCL1	0.75463	0.554904	0.729803	0.630448
cg00425792	PEX12	0.722222	0.544025	0.702026	0.613008
cg21792737	NOX3	0.755787	0.554904	0.742458	0.635124
