# Supplementary material for: Classification of lung cancer using ensemble-based feature selection and machine learning methods
Source: Royal Society of Chemistry journal article supplement (doi:10.1039/c4mb00659c), 2014-12-05
Supplement: c4mb00659c4.xlsx [file c4mb00659c4.xlsx]

## Sheet: Sheet1
Table S1 D. IFS performance curve on top 140 RF feature sets
probe ID	gene	accuracy	precision	recall	F-score
cg00314943	ALPPL2	0.525948	0.359797	0.538648	0.431421
cg23514672	FLJ32871	0.564204	0.406788	0.546328	0.466343
cg03693099	CEL	0.623749	0.406028	0.598117	0.483699
cg13314167	C9orf84	0.536526	0.388308	0.550296	0.455324
cg13576061	IL6ST	0.640047	0.452982	0.630287	0.527124
cg25355803	MARVELD1	0.530573	0.386396	0.514937	0.441501
cg05498681	SRC	0.614193	0.469718	0.643564	0.543068
cg06363129	SOSTDC1	0.649387	0.501104	0.664886	0.571492
cg09990086	TACC1	0.553573	0.378985	0.570295	0.455362
cg14769265	PCYT1A	0.679529	0.482278	0.680502	0.564494
cg10740965	CTNNBIP1	0.535854	0.355905	0.552259	0.432855
cg15905979	ST18	0.626861	0.488141	0.661099	0.561605
cg07919162	SF4	0.681586	0.513746	0.666485	0.580232
cg05044994	FLJ42393	0.714468	0.550907	0.724215	0.625783
cg13882267	ITGA9	0.653051	0.526666	0.662833	0.586955
cg04886198	ALG3	0.646365	0.548691	0.626586	0.585057
cg20851245	RNF25	0.635797	0.499725	0.648815	0.564594
cg19988449	BNC1	0.586673	0.454148	0.642202	0.532047
cg18565510	CENTB5	0.603594	0.479796	0.635211	0.546672
cg25203980	CENTB5	0.653663	0.548244	0.735785	0.628319
cg03001305	STAT5A	0.726852	0.522824	0.712351	0.603047
cg22384366	PIK3CA	0.756124	0.562688	0.709863	0.627765
cg23076086	FYN	0.75463	0.560218	0.724157	0.631725
cg11177450	SENP5	0.759259	0.559234	0.754146	0.642227
cg00559473	AAAS	0.724537	0.527391	0.703941	0.603009
cg01746088	SFRS7	0.798611	0.603527	0.810827	0.691985
cg21596858	DCST2	0.730324	0.54229	0.693457	0.608628
cg17391929	NEDD8	0.755787	0.560642	0.725677	0.632573
cg02973263	PRKCI	0.715278	0.524609	0.66716	0.587359
cg13393195	IQCD	0.729167	0.526969	0.725736	0.610583
cg07883333	F11R	0.75	0.564018	0.710021	0.628654
cg21207418	ACP5	0.751157	0.555338	0.720722	0.627313
cg02523617	HIP2	0.760417	0.561268	0.751619	0.642644
cg15931943	FHIT	0.767361	0.580453	0.743939	0.652106
cg09147213	HOMER1	0.746528	0.547102	0.720505	0.621943
cg21743830	CCL25	0.761574	0.558851	0.771559	0.648201
cg10353436	EIF4A1	0.746528	0.543363	0.735272	0.624916
cg13625403	TRIM29	0.77662	0.562615	0.795645	0.65914
cg07292816	EFCAB3	0.771991	0.562881	0.780561	0.654085
cg11256445	HCLS1	0.730324	0.547003	0.674939	0.604274
cg09545860	NS4ATP2	0.736111	0.522722	0.76072	0.619654
cg23089298	SEMA4C	0.741898	0.534158	0.753159	0.62503
cg03534410	TMEM40	0.790509	0.603579	0.75464	0.670709
cg04739149	DOC1	0.78125	0.593701	0.765419	0.668712
cg15105987	SOX2	0.763889	0.558786	0.776376	0.649851
cg11977634	DDR1	0.784722	0.583438	0.788814	0.670757
cg09009042	PPP1R8	0.734954	0.529474	0.740879	0.617586
cg08504583	FLJ30046	0.788194	0.598999	0.757601	0.669029
cg21209091	DKK4	0.763889	0.569114	0.739714	0.643296
cg19612574	MAPK8	0.75	0.550651	0.745479	0.633422
cg03679305	SLC2A5	0.768519	0.567967	0.76305	0.651212
cg08046471	CXCL11	0.721065	0.515323	0.710969	0.597539
cg24560809	PROM2	0.688657	0.488945	0.661711	0.562358
cg13921352	FAM19A4	0.761574	0.561086	0.749862	0.641882
cg03846767	TP73	0.778935	0.575071	0.786958	0.664533
cg12085225	SETX	0.762731	0.577431	0.718017	0.640096
cg09875273	ERBB2	0.744213	0.552377	0.716635	0.623875
cg13553455	COL17A1	0.771991	0.563174	0.780877	0.654395
cg10936763	CDKN1A	0.782407	0.601036	0.74309	0.664557
cg14009312	STK11	0.773148	0.572775	0.788913	0.66369
cg02388150	SFRP1	0.75	0.557544	0.726743	0.630998
cg26928972	CSTA	0.717593	0.532953	0.664673	0.591569
cg09827833	TEK	0.751157	0.560344	0.72854	0.633467
cg01770232	IL6	0.759259	0.562369	0.743051	0.640206
cg02831294	CALML3	0.708333	0.51067	0.667318	0.578579
cg27638597	SNTA1	0.721065	0.53506	0.669648	0.594836
cg23112213	CDC23	0.724537	0.523533	0.705007	0.600867
cg14288464	WFDC5	0.778935	0.578744	0.777857	0.663688
cg06530118	CLN3	0.767361	0.585275	0.7224	0.646648
cg24459563	CACNG1	0.770833	0.568037	0.777482	0.656458
cg15219393	PPARGC1B	0.756944	0.55493	0.741669	0.634852
cg02301754	TMOD4	0.740741	0.534823	0.735154	0.619188
cg10493739	TMEM38B	0.762731	0.556198	0.775053	0.647636
cg25462303	GCET2	0.744213	0.561969	0.689647	0.619296
cg12754733	FLJ35119	0.704861	0.511387	0.657743	0.575404
cg07752420	CDKN2A	0.753472	0.550619	0.751303	0.635494
cg07749074	HRG	0.787037	0.591936	0.776534	0.671784
cg14966252	ZNF622	0.74537	0.556645	0.692668	0.617251
cg09878269	PROZ	0.737269	0.535987	0.733673	0.61944
cg06868758	NDUFS1	0.746528	0.5399	0.746427	0.626584
cg02034222	DQX1	0.760417	0.562426	0.766209	0.64869
cg03905094	DEPDC1B	0.728009	0.535424	0.688127	0.602247
cg09893068	CCDC17	0.75	0.55155	0.725835	0.626803
cg23704362	C8orf46	0.75	0.548142	0.749329	0.633138
cg10221736	TICAM1	0.708333	0.501045	0.711127	0.587881
cg01086868	AR	0.743056	0.547894	0.728283	0.62534
cg10528989	BDKRB1	0.685185	0.481861	0.666055	0.55918
cg03860890	EGFR	0.788194	0.584662	0.790137	0.672044
cg14127336	TCL1A	0.721065	0.526111	0.682086	0.59403
cg15760943	ETV5	0.761574	0.58351	0.716102	0.643042
cg20394284	JAK2	0.767361	0.599219	0.702717	0.646854
cg12446644	LASP1	0.784722	0.608281	0.743149	0.668986
cg03700462	HOXA1	0.77662	0.570124	0.790196	0.662358
cg18110535	LPIN2	0.741898	0.542318	0.724256	0.62022
cg04254916	KRT5	0.769676	0.589474	0.713832	0.64572
cg14334099	PTPN12	0.778935	0.591109	0.746802	0.659896
cg05243909	NTHL1	0.755787	0.546846	0.769664	0.639399
cg04371779	C14orf118	0.759259	0.561858	0.737444	0.637787
cg08779777	PIK3CG	0.755787	0.558077	0.740346	0.636418
cg17342759	PPP2R2B	0.752315	0.567705	0.699656	0.626811
cg02917972	ZCCHC11	0.790509	0.592019	0.785537	0.675185
cg13474750	SH3BP1	0.765046	0.564306	0.753633	0.64537
cg24340657	KRT24	0.762731	0.565791	0.757226	0.647659
cg03776464	EPHA4	0.761574	0.559031	0.746387	0.639264
cg21932814	CSTA	0.71875	0.526328	0.676795	0.592152
cg23213688	EXOC8	0.787037	0.580394	0.799297	0.67248
cg18515587	SELENBP1	0.752315	0.542586	0.760029	0.633159
cg18368125	TMED6	0.780093	0.585395	0.771401	0.665648
cg26651830	BCAP29	0.755787	0.545335	0.786958	0.644236
cg20713492	AQP10	0.74537	0.55883	0.702026	0.622296
cg22294908	ZHX3	0.746528	0.559125	0.69251	0.61871
cg00777121	RASSF1	0.743056	0.539898	0.729073	0.620385
cg06547766	LPP	0.72338	0.520594	0.703467	0.59837
cg12090388	RPL11	0.789352	0.602394	0.753258	0.669432
cg27554769	KLHL12	0.753472	0.568788	0.707001	0.630408
cg08651674	RREB1	0.763889	0.557784	0.77146	0.647448
cg13412063	SOS1	0.773148	0.571908	0.776692	0.658752
cg21898046	MGAT1	0.725694	0.536289	0.683349	0.600953
cg10289912	ZNRF2	0.806111	0.639935	0.811568	0.715604
cg11693019	AKR1B10	0.770833	0.578694	0.755686	0.655452
cg19196684	SLC1A7	0.716435	0.51036	0.711778	0.594471
cg25955816	HIST3H3	0.755787	0.543572	0.7822	0.641411
cg19162158	NRG1	0.78125	0.588647	0.767492	0.666277
cg03392046	CCDC75	0.734954	0.52341	0.75464	0.618107
cg02863237	RBM17	0.747685	0.556229	0.733989	0.632864
cg11148307	C10orf92	0.74537	0.540976	0.752784	0.629542
cg12437239	GOLPH4	0.725694	0.518334	0.736911	0.608592
cg10005894	ST6GAL1	0.768519	0.590774	0.724039	0.650653
cg11840168	RBBP8	0.728009	0.51816	0.744097	0.610908
cg11398517	FAM112A	0.740741	0.56458	0.67251	0.613837
cg01705458	CCDC34	0.788194	0.599259	0.767709	0.673105
cg12567315	TSPAN13	0.760417	0.583663	0.69938	0.636304
cg19570545	PKP1	0.765046	0.572991	0.726645	0.640735
cg23877786	RPL13	0.740741	0.553359	0.698275	0.617427
cg20442697	LRRC17	0.748843	0.564313	0.694523	0.622684
cg22264436	SOST	0.725694	0.535652	0.675156	0.597368
cg04710641	RDBP	0.763889	0.563958	0.759496	0.647282
cg26809911	COG7	0.756944	0.558673	0.739181	0.636375
cg20854748	PIP5K1A	0.751157	0.557854	0.725796	0.630839
cg27485235	CLCN2	0.724537	0.522117	0.708284	0.601117
