# Supplementary material for: Classification of lung cancer using ensemble-based feature selection and machine learning methods
Source: Royal Society of Chemistry journal article supplement (doi:10.1039/c4mb00659c), 2014-12-05
Supplement: c4mb00659c5.pdf [file c4mb00659c5.pdf]

**Supplementary Table S2. Confusion matrices of training data sets and independent data sets.**

Table S2 1. Confusion matrix of training data sets (the numbers are averaged numbers in LOOCV).

|                |       | Predicted Classes |       |      |
|----------------|-------|-------------------|-------|------|
|                |       | LADC              | SQCLC | SCLC |
| Actual Classes | LADC  | 112               | 12    | 2    |
|                | SQCLC | 14                | 115   | 5    |
|                | SCLC  | 4                 | 2     | 22   |

Table S2 2. Confusion matrix of independent data sets.

|                |       | Predicted Classes |       |      |
|----------------|-------|-------------------|-------|------|
|                |       | LADC              | SQCLC | SCLC |
| Actual Classes | LADC  | 396               | 51    | 5    |
|                | SQCLC | 60                | 290   | 9    |
