# Supplementary material for: Classification of lung cancer using ensemble-based feature selection and machine learning methods
Source: Royal Society of Chemistry journal article supplement (doi:10.1039/c4mb00659c), 2014-12-05
Supplement: c4mb00659c6.xlsx [file c4mb00659c6.xlsx]

## Sheet: Sheet1
Table S3 Annotation of 16 selected DNA methylation marker genes
probe ID	Gene Symbol	Annotation
cg15905979	ST18	suppression of tumorigenicity 18, zinc finger;zinc finger protein 387; go_component: nucleus; go_function: transcription factor activity; go_process: regulation of transcription; DNA-dependent
cg10493739	TMEM38B	transmembrane protein 38B; This gene encodes an intracellular monovalent cation channel that functions in maintenance of intracellular calcium release. Mutations in this gene may be associated with autosomal recessive osteogenesis
cg14288464	WFDC5	protease inhibitor WAP1; p53-responsive gene 5; go_function: serine-type endopeptidase inhibitor activity
cg19570545	PKP1	plakophilin 1;isoform 1a is encoded by transcript variant 1a; band 6 protein; go_component: nucleus; go_component: cytoskeleton; go_component: desmosome; go_component: plasma membrane; go_component: intermediate filament; go_function: signal transducer activity; go_function: signal transducer activity; go_function: intermediate filament binding; go_function: structural constituent of epidermis; g…
cg03700462	HOXA1	homeo box A1.isoform a is encoded by transcript variant 1; homeobox protein HOX-A1; class I homeobox; homeobox 1F; Hox 1.6-like protein; lab-like protein; go_component: nucleus; go_function: transcription factor activity; go_function: RNA polymerase II transcription factor activity; go_process: development; go_process: regulation of transcription; DNA-dependent
cg07752420	CDKN2A	cyclin-dependent kinase inhibitor 2A.isoform 3 is encoded by transcript variant 3; multiple tumor suppressor 1; cyclin-dependent kinase inhibitor p16; cell cycle negative regulator beta; CDK4 inhibitor p16-INK4; cyclin-dependent kinase inhibitor 2A; p14ARF; go_component: nucleus; go_component: nucleus; go_function: DNA binding; go_function: protein binding; go_function: protein binding; go_functi…
cg02917972	ZCCHC11	zinc finger, CCHC domain containing 11;isoform b is encoded by transcript variant 2; PAP associated domain containing 3; go_component: nucleus; go_function: zinc ion binding; go_function: metal ion binding; go_function: nucleic acid binding; go_function: nucleotidyltransferase activity
cg13474750	SH3BP1	SH3 domain binding protein 1; go_component: cytoplasm; go_function: protein binding; go_function: protein binding; go_function: GTPase activator activity
cg23089298	SEMA4C	sema domain, immunoglobulin domain (Ig), transmembrane domain (TM) and short cytoplasmic domain, (semaphorin) 4C.go_component: membrane; go_component: integral to membrane; go_function: receptor activity; go_process: cell differentiation; go_process: nervous system development
cg25955816	HIST3H3	histone 3, H3.go_component: nucleus; go_component: chromosome; go_component: nucleosome; go_function: DNA binding; go_process: nucleosome assembly; go_process: chromosome organization and biogenesis (sensu Eukaryota)
cg20851245	RNF25	ring finger protein AO7; go_component: ubiquitin ligase complex; go_function: ligase activity; go_function: zinc ion binding; go_function: metal ion binding; go_function: ubiquitin-protein ligase activity; go_process: protein ubiquitination
cg02863237	RBM17	RNA binding motif protein 17;splicing factor (45kD); go_component: intracellular; go_component: spliceosome complex; go_function: RNA binding; go_function: nucleotide binding; go_function: nucleic acid binding; go_process: nuclear mRNA splicing; via spliceosome
cg25203980	CENTB5	centaurin, beta 5;go_function: metal ion binding; go_function: GTPase activator activity; go_process: regulation of GTPase activity
cg10289912	ZNRF2	zinc and ring finger 2;go_component: ubiquitin ligase complex; go_function: zinc ion binding; go_function: metal ion binding; go_function: ubiquitin-protein ligase activity; go_process: protein ubiquitination
cg18565510	CENTB5	centaurin, beta 5;go_function: metal ion binding; go_function: GTPase activator activity; go_process: regulation of GTPase activity
cg20854748	PIP5K1A	phosphatidylinositol-4-phosphate 5-kinase, type I, alpha;go_component: cellular component unknown; go_function: kinase activity; go_function: transferase activity; go_function: 1-phosphatidylinositol-4-phosphate 5-kinase activity; go_function: 1-phosphatidylinositol-4-phosphate 5-kinase activity; go_process: phosphorylation; go_process: signal transduction; go_process: glycerophospholipid metabol…
